# Supplementary material for: Protective effect of polaprezinc on cadmium-induced injury of lung epithelium
Source: Royal Society of Chemistry journal article supplement (doi:10.1039/c9mt00060g), 2019-06-19
Supplement: c9mt00060g1.pdf [file c9mt00060g1.pdf]

**Protective effect of polaprezinc on cadmium-induced injury of lung epithelium.**

Kazuma Kimura\*, Yukari Nakano\*, Toshifumi Sugizaki\*, Mikako Shimoda, Nahoko Kobayashi,  
Masahiro Kawahara, Ken-ichiro Tanaka

Department of Bio-Analytical Chemistry, Faculty of Pharmacy, Musashino University, 1-1-20  
Shinmachi, Nishitokyo-shi, Tokyo 202-8585, Japan.

\*These three authors contributed equally to this work.

**Corresponding author**

Dr. Ken-ichiro Tanaka, Laboratory of Bio-Analytical Chemistry, Research Institute of Pharmaceutical  
Sciences, Musashino University, 1-1-20 Shinmachi, Nishitokyo-shi, Tokyo 202-8585, Japan. TEL &  
FAX: 81-42-468-9335, E-mail: [k-tana@musashino-u.ac.jp](mailto:k-tana@musashino-u.ac.jp)

## Supplementary Figure S1

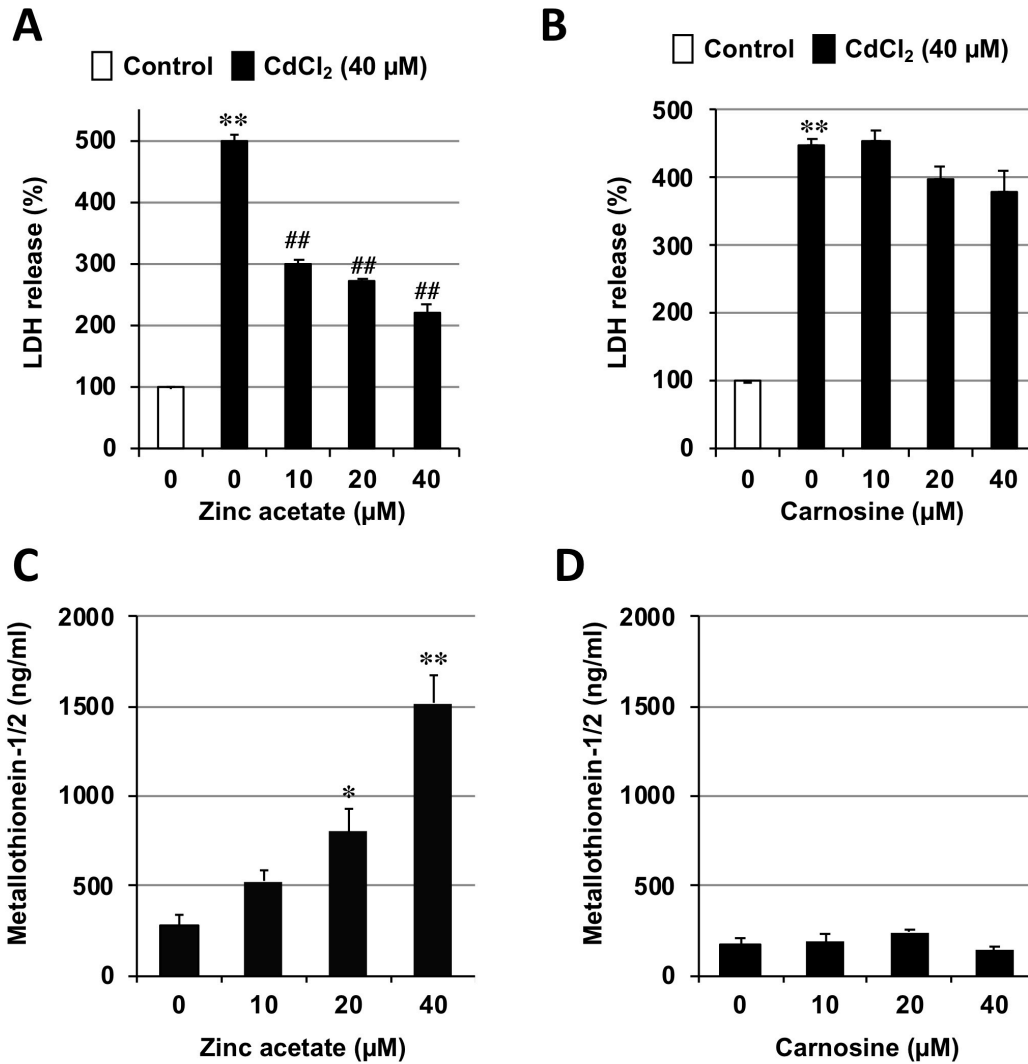

### Supplementary Figure S1.

A549 cells were pre-incubated with the indicated concentrations of zinc acetate (A) or carnosine (B) for 24 h and then with the indicated concentrations of zinc acetate or carnosine in the absence (control) or presence of CdCl<sub>2</sub> (40  $\mu\text{M}$ ) for 24 h. LDH release into the culture medium was determined using an LDH activity assay kit (A, B). A549 cells were incubated with the indicated concentrations of zinc acetate (C) or carnosine (D) for 24 h and the levels of metallothionein-1, 2 in whole cell extracts were then determined using an ELISA kit (C, D). Values represent the mean  $\pm$  S.E. #  $P < 0.05$ ; \*\* or ##  $P < 0.01$  (\* vs Control, # vs CdCl<sub>2</sub> alone).

## Supplementary Figure S2

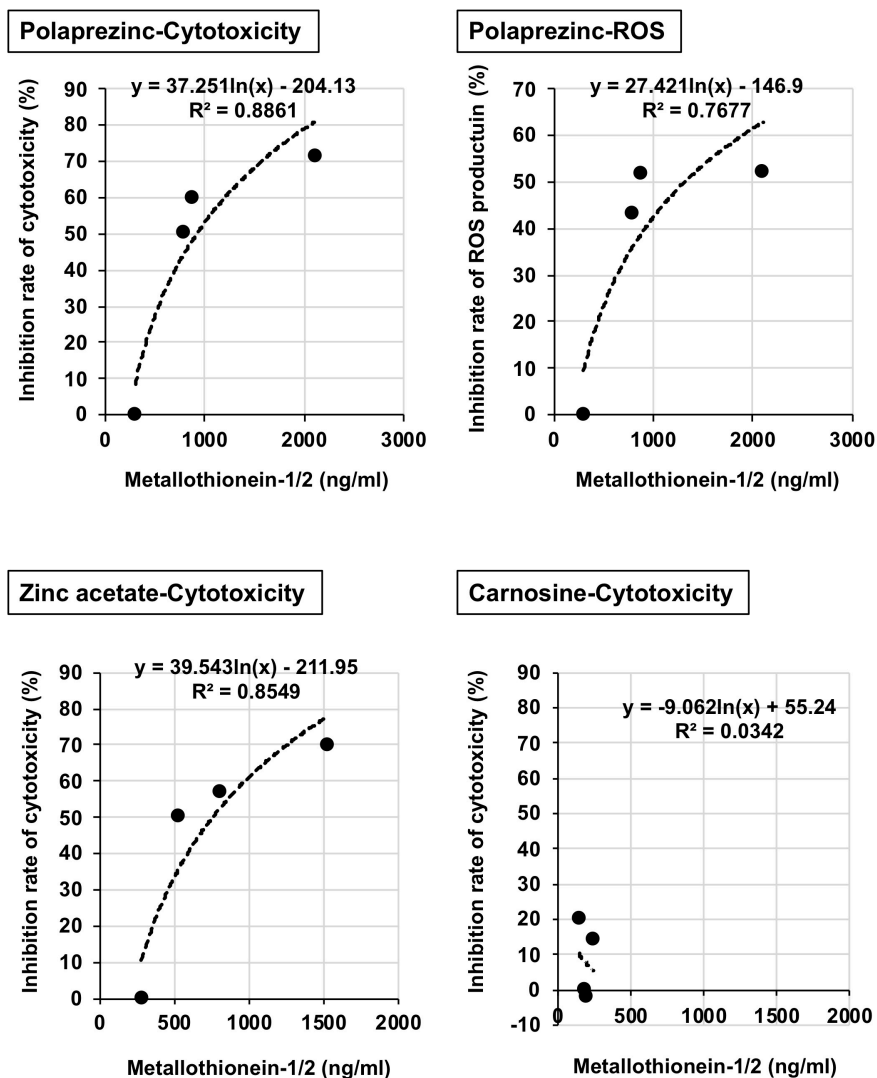

### Supplementary Figure S2.

Correlations between the inhibition of cytotoxicity or ROS production and MT induction by polaprezinc, zinc acetate, or carnosine based on the data in Figures 2D, 4B, 6A, and Supplementary Figure 1. The inhibition of cytotoxicity and ROS production was calculated assuming that treatment with  $\text{CdCl}_2$  produced 0% inhibition and the control was 100%. Because the coefficient of determination ( $R^2$ ) was 0.8 or more, there was a strong correlation between inhibition of cytotoxicity or ROS production and MT induction by polaprezinc or zinc acetate. In contrast, no correlation was found between inhibition of cytotoxicity and MT induction by carnosine. These results indicate that MT induction by zinc contained in polaprezinc is important to suppress  $\text{CdCl}_2$ -induced cytotoxicity.

## Supplementary Figure S3

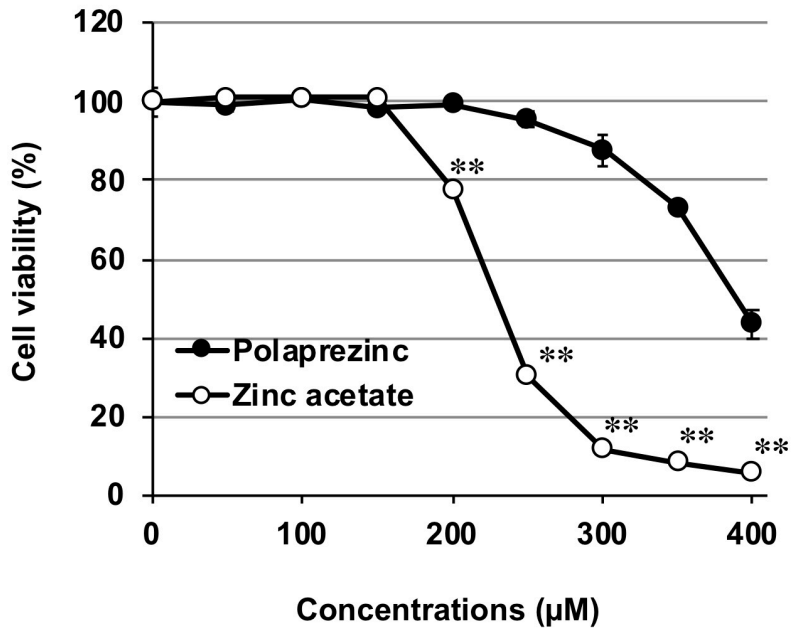

### Supplementary Figure S3.

A549 cells were incubated with the indicated concentrations of polaprezinc or zinc acetate for 24 h. Viable cell number was determined using CellTiter-Glo<sup>®</sup> 2.0. Values represent the mean  $\pm$  S.E. \*\*P<0.01 (\* polaprezinc vs zinc acetate).
